# Supplementary material
Source: MDPI journal article supplement (https://www.mdpi.com/2072-4292/16/5/866)
Supplement: s1 [file s1]

## Supplementary material

*Article*

# **Cropland and Crop Type Classification with Sentinel-1 and Sentinel-2 Time-series using Google Earth Engine for Agricultural Monitoring in Ethiopia**

(please see the three following pages)

## Amhara 2021

| Reference data<br>LULC class | Classified data |      |      |       |       |      |      |      |      |       | Total | PA [%] |
|------------------------------|-----------------|------|------|-------|-------|------|------|------|------|-------|-------|--------|
|                              | TC              | GW   | CL   | BA    | WA    | SL   | SV   | FC   | TP   | YP    |       |        |
| Tree cover (TC)              | 12              | -    | -    | -     | -     | 3    | -    | -    | -    | -     | 15    | 80.0   |
| Grassland/Wetland (GW)       | -               | 22   | 5    | -     | -     | -    | 2    | 2    | -    | -     | 31    | 71.0   |
| Cropland (CL)                | 1               | -    | 200  | -     | -     | 4    | -    | 3    | 1    | -     | 209   | 95.7   |
| Bare/Built-up (BA)           | -               | -    | -    | 26    | -     | -    | -    | -    | -    | -     | 26    | 100.0  |
| Water (WA)                   | -               | -    | -    | -     | 1     | -    | -    | -    | -    | -     | 1     | 100.0  |
| Shrubland (SL)               | 2               | -    | 15   | -     | -     | 55   | -    | -    | -    | -     | 72    | 76.4   |
| Sparse vegetation (SV)       | -               | 8    | 1    | -     | -     | 3    | 9    | 2    | -    | -     | 23    | 39.1   |
| Fallow cropland (FC)         | -               | -    | 1    | -     | -     | -    | -    | 36   | -    | -     | 37    | 97.3   |
| Tree plantation (TP)         | -               | -    | -    | -     | -     | 1    | -    | -    | 13   | -     | 14    | 92.9   |
| Young plantation (YP)        | -               | -    | -    | -     | -     | -    | -    | -    | -    | 3     | 3     | 100.0  |
| Total                        | 15              | 30   | 222  | 26    | 1     | 66   | 11   | 43   | 14   | 3     | 431   | OA [%] |
| UA [%]                       | 80.0            | 73.3 | 90.1 | 100.0 | 100.0 | 83.3 | 81.8 | 83.7 | 92.9 | 100.0 |       | 87.5   |

## Benishangul 2021

| Reference data<br>LULC class | Classified data |      |      |      |       |      |      |      |       |    | Total | PA [%] |
|------------------------------|-----------------|------|------|------|-------|------|------|------|-------|----|-------|--------|
|                              | TC              | GW   | CL   | BA   | WA    | SL   | SV   | FC   | TP    | YP |       |        |
| Tree cover (TC)              | 50              | -    | -    | -    | -     | 2    | -    | -    | -     | -  | 52    | 96.2   |
| Grassland/Wetland (GW)       | -               | 70   | 17   | -    | -     | 7    | 2    | -    | -     | -  | 96    | 72.9   |
| Cropland (CL)                | -               | 17   | 388  | -    | -     | 17   | 4    | 2    | -     | -  | 428   | 90.7   |
| Bare/Built-up (BA)           | -               | -    | 1    | 37   | -     | 1    | 2    | -    | -     | -  | 41    | 90.2   |
| Water (WA)                   | -               | -    | -    | -    | 2     | -    | -    | -    | -     | -  | 2     | 100.0  |
| Shrubland (SL)               | 2               | 5    | 11   | -    | -     | 195  | -    | -    | -     | -  | 213   | 91.5   |
| Sparse vegetation (SV)       | -               | 1    | 2    | -    | -     | -    | 32   | 2    | -     | -  | 37    | 86.5   |
| Fallow cropland (FC)         | -               | 1    | 3    | 1    | -     | -    | -    | 35   | -     | -  | 40    | 87.5   |
| Tree plantation (TP)         | -               | -    | -    | -    | -     | -    | -    | -    | 13    | -  | 13    | 100.0  |
| Total                        | 52              | 94   | 422  | 38   | 2     | 222  | 40   | 39   | 13    |    | 922   | OA [%] |
| UA [%]                       | 96.2            | 74.5 | 91.9 | 97.4 | 100.0 | 87.8 | 80.0 | 89.7 | 100.0 |    |       | 89.2   |

## Gambella 2021

| Reference data<br>LULC class | Classified data |      |      |      |       |      |      |      |   |   | Total | PA [%] |
|------------------------------|-----------------|------|------|------|-------|------|------|------|---|---|-------|--------|
|                              | TC              | GW   | CL   | BA   | WA    | SL   | FC   | MV   |   |   |       |        |
| Tree cover (TC)              | 45              | -    | -    | -    | -     | 5    | -    | -    | - | - | 50    | 90.0   |
| Grassland/Wetland (GW)       | -               | 100  | 15   | -    | -     | 8    | 1    | -    | - | - | 124   | 80.6   |
| Cropland (CL)                | -               | 1    | 512  | -    | -     | 9    | -    | 1    | - | - | 523   | 97.9   |
| Bare/Built-up (BA)           | -               | -    | 1    | 24   | -     | -    | 2    | 1    | - | - | 28    | 85.7   |
| Water (WA)                   | -               | -    | -    | -    | 7     | -    | -    | -    | - | - | 7     | 100.0  |
| Shrubland (SL)               | 1               | 4    | 33   | -    | -     | 139  | -    | -    | - | - | 177   | 78.5   |
| Fallow cropland (FC)         | -               | -    | -    | 3    | -     | -    | 23   | -    | - | - | 26    | 88.5   |
| Mixed vegetated/bare (MV)    | -               | 2    | 11   | 1    | -     | -    | -    | 11   | - | - | 25    | 44.0   |
| Total                        | 46              | 107  | 572  | 28   | 7     | 161  | 26   | 13   |   |   | 960   | OA [%] |
| UA [%]                       | 97.8            | 93.5 | 89.5 | 85.7 | 100.0 | 86.3 | 88.5 | 84.6 |   |   |       | 89.7   |

## Amhara 2022

| Reference data<br>LULC class | Classified data |      |      |      |       |      |      |       |      |       | Total | PA [%] |
|------------------------------|-----------------|------|------|------|-------|------|------|-------|------|-------|-------|--------|
|                              | TC              | GW   | CL   | BA   | WA    | SL   | SV   | FC    | TP   | YP    |       |        |
| Tree cover (TC)              | 19              | -    | -    | -    | -     | 2    | -    | -     | 2    | -     | 23    | 82.6   |
| Grassland/Wetland (GW)       | 2               | 32   | 3    | -    | -     | -    | -    | -     | -    | -     | 37    | 86.5   |
| Cropland (CL)                | 2               | -    | 212  | -    | -     | 5    | 1    | -     | -    | -     | 220   | 96.4   |
| Bare/Built-up (BA)           | -               | -    | -    | 14   | -     | -    | -    | -     | -    | -     | 14    | 100.0  |
| Water (WA)                   | -               | -    | -    | -    | 2     | -    | -    | -     | -    | -     | 2     | 100.0  |
| Shrubland (SL)               | -               | 3    | 7    | -    | -     | 64   | 1    | -     | -    | -     | 75    | 85.3   |
| Sparse vegetation (SV)       | -               | -    | 3    | 1    | -     | 8    | 3    | -     | -    | -     | 15    | 20.0   |
| Fallow cropland (FC)         | -               | -    | 3    | -    | -     | -    | -    | 7     | -    | -     | 10    | 70.0   |
| Tree plantation (TP)         | 1               | -    | 1    | -    | -     | -    | -    | -     | 20   | -     | 22    | 90.9   |
| Young plantation (YP)        | -               | 2    | -    | -    | -     | -    | -    | -     | -    | 2     | 4     | 50.0   |
| Total                        | 24              | 37   | 229  | 15   | 2     | 79   | 5    | 7     | 22   | 2     | 422   | OA [%] |
| UA [%]                       | 79.2            | 86.5 | 92.6 | 93.3 | 100.0 | 81.0 | 60.0 | 100.0 | 90.9 | 100.0 |       | 88.9   |

## Benishangul 2022

| Reference data<br>LULC class | Classified data |      |      |      |       |      |      |      |      |    | Total | PA [%] |
|------------------------------|-----------------|------|------|------|-------|------|------|------|------|----|-------|--------|
|                              | TC              | GW   | CL   | BA   | WA    | SL   | SV   | FC   | TP   | YP |       |        |
| Tree cover (TC)              | 47              | 1    | -    | -    | -     | 2    | -    | -    | -    | -  | 50    | 94.0   |
| Grassland/Wetland (GW)       | -               | 86   | 10   | -    | -     | 4    | 1    | -    | 2    | -  | 103   | 83.5   |
| Cropland (CL)                | -               | 16   | 272  | -    | -     | 18   | 1    | 2    | 2    | -  | 311   | 87.5   |
| Bare/Built-up (BA)           | -               | 1    | -    | 49   | -     | -    | 1    | -    | -    | -  | 51    | 96.1   |
| Water (WA)                   | -               | -    | -    | -    | 1     | -    | -    | -    | -    | -  | 1     | 100.0  |
| Shrubland (SL)               | 3               | 4    | 15   | -    | -     | 192  | 2    | -    | -    | -  | 216   | 88.9   |
| Sparse vegetation (SV)       | -               | 10   | 2    | 1    | -     | 1    | 25   | -    | -    | -  | 39    | 64.1   |
| Fallow cropland (FC)         | -               | -    | 1    | -    | -     | -    | -    | 13   | -    | -  | 14    | 92.9   |
| Tree plantation (TP)         | 2               | -    | -    | -    | -     | -    | -    | -    | 10   | -  | 12    | 83.3   |
| Total                        | 52              | 118  | 300  | 50   | 1     | 217  | 30   | 15   | 14   |    | 797   | OA [%] |
| UA [%]                       | 90.4            | 72.9 | 90.7 | 98.0 | 100.0 | 88.5 | 83.3 | 86.7 | 71.4 |    |       | 87.2   |

## Gambella 2022

| Reference data<br>LULC class | Classified data |      |      |       |      |      |      |      |       |      | Total | PA [%] |
|------------------------------|-----------------|------|------|-------|------|------|------|------|-------|------|-------|--------|
|                              | TC              | GW   | CL   | BA    | WA   | SL   | SV   | FC   | TP    | MV   |       |        |
| Tree cover (TC)              | 39              | -    | 1    | -     | -    | 5    | -    | -    | -     | -    | 45    | 86.7   |
| Grassland/Wetland (GW)       | -               | 138  | 18   | -     | 1    | 9    | 2    | -    | -     | -    | 168   | 82.1   |
| Cropland (CL)                | -               | 2    | 402  | -     | -    | 28   | -    | -    | -     | -    | 432   | 93.1   |
| Bare/Built-up (BA)           | -               | -    | -    | 32    | -    | -    | 1    | 1    | -     | 1    | 35    | 91.4   |
| Water (WA)                   | -               | -    | -    | -     | 5    | -    | -    | -    | -     | -    | 5     | 100.0  |
| Shrubland (SL)               | -               | 9    | 39   | -     | -    | 240  | 2    | -    | -     | 3    | 293   | 81.9   |
| Sparse vegetation (SV)       | -               | 1    | 6    | -     | -    | -    | 18   | 1    | -     | -    | 26    | 69.2   |
| Fallow cropland (FC)         | -               | -    | 3    | -     | -    | -    | -    | 5    | -     | -    | 8     | 62.5   |
| Tree plantation (TP)         | -               | -    | -    | -     | -    | -    | -    | -    | 6     | -    | 6     | 100.0  |
| Mixed vegetated/bare (MV)    | -               | -    | 5    | -     | -    | 3    | -    | -    | -     | 26   | 34    | 76.5   |
| Total                        | 39              | 150  | 474  | 32    | 6    | 285  | 23   | 7    | 6     | 30   | 1052  | OA [%] |
| UA [%]                       | 100.0           | 92.0 | 84.8 | 100.0 | 83.3 | 84.2 | 78.3 | 71.4 | 100.0 | 86.7 |       | 86.6   |

**Figure S1.** Confusion matrix tables for the LULC classifications for the three study areas Amhara, Benishangul and Gambela for the years 2021 and 2022. The accuracies are given as user's accuracies (UA), producer's accuracies (PA) and overall accuracy (OA).

**Table S1.** Overview of the 33 input data variants tested for random forest crop type classification. The table provides information about variant category (column 1), bands/indices/parameters included as input features (column 2), number of input features (column 3), and overall accuracies retrieved (columns 4–12). The overall accuracies are provided for the six individual classifications, as average for each study area, and as overall mean.

| 33 Variants       |                                          |                       | Overall accuracies |          |          |          |          |          |             |             |             |              |
|-------------------|------------------------------------------|-----------------------|--------------------|----------|----------|----------|----------|----------|-------------|-------------|-------------|--------------|
| Category          | Input features                           | No. of input features | AMH 2021           | AMH 2022 | BEN 2021 | BEN 2022 | GAM 2021 | GAM 2022 | AMH Average | BEN Average | GAM Average | Overall mean |
| VI                | NDVI                                     | 8                     | 0.85               | 0.73     | 0.64     | 0.74     | 0.83     | 0.77     | 0.79        | 0.69        | 0.80        | 0.76         |
|                   | MSR                                      | 8                     | 0.84               | 0.73     | 0.65     | 0.75     | 0.80     | 0.76     | 0.78        | 0.70        | 0.78        | 0.75         |
|                   | EVI                                      | 8                     | 0.86               | 0.72     | 0.63     | 0.74     | 0.89     | 0.75     | 0.79        | 0.69        | 0.82        | 0.76         |
|                   | EVI2                                     | 8                     | 0.84               | 0.77     | 0.63     | 0.74     | 0.89     | 0.73     | 0.80        | 0.69        | 0.81        | 0.77         |
|                   | SAVI                                     | 8                     | 0.85               | 0.73     | 0.59     | 0.72     | 0.87     | 0.73     | 0.79        | 0.66        | 0.80        | 0.75         |
|                   | GNDVI                                    | 8                     | 0.84               | 0.67     | 0.61     | 0.76     | 0.89     | 0.73     | 0.75        | 0.68        | 0.81        | 0.75         |
|                   | NDRe1                                    | 8                     | 0.84               | 0.66     | 0.66     | 0.73     | 0.85     | 0.76     | 0.75        | 0.70        | 0.81        | 0.75         |
|                   | NDRe2                                    | 8                     | 0.81               | 0.74     | 0.66     | 0.73     | 0.85     | 0.77     | 0.78        | 0.70        | 0.81        | 0.76         |
|                   | ReNDVI                                   | 8                     | 0.85               | 0.73     | 0.70     | 0.73     | 0.83     | 0.70     | 0.79        | 0.71        | 0.77        | 0.75         |
|                   | GNDWI                                    | 8                     | 0.80               | 0.65     | 0.61     | 0.79     | 0.88     | 0.73     | 0.73        | 0.70        | 0.80        | 0.74         |
|                   | NDWI1                                    | 8                     | 0.82               | 0.68     | 0.63     | 0.74     | 0.85     | 0.70     | 0.75        | 0.69        | 0.78        | 0.74         |
|                   | NDWI2                                    | 8                     | 0.83               | 0.69     | 0.64     | 0.77     | 0.84     | 0.76     | 0.76        | 0.70        | 0.80        | 0.75         |
| VI combined       | EVI2 + NDRe2                             | 16                    | 0.88               | 0.81     | 0.70     | 0.78     | 0.88     | 0.77     | 0.85        | 0.74        | 0.83        | 0.80         |
|                   | EVI2 + NDRe2 + GNDWI                     | 24                    | 0.89               | 0.80     | 0.73     | 0.81     | 0.88     | 0.77     | 0.84        | 0.77        | 0.82        | 0.81         |
|                   | EVI2 + NDRe2 + NDWI2                     | 24                    | 0.86               | 0.77     | 0.73     | 0.79     | 0.89     | 0.77     | 0.82        | 0.76        | 0.83        | 0.80         |
| S2                | S2 bands                                 | 80                    | 0.93               | 0.82     | 0.81     | 0.86     | 0.88     | 0.79     | 0.87        | 0.83        | 0.84        | 0.85         |
| S2 + VI           | S2 bands + EVI2                          | 88                    | 0.89               | 0.81     | 0.80     | 0.86     | 0.88     | 0.78     | 0.85        | 0.83        | 0.83        | 0.84         |
|                   | S2 bands + EVI2 + NDRe2                  | 96                    | 0.92               | 0.81     | 0.80     | 0.87     | 0.89     | 0.81     | 0.87        | 0.84        | 0.85        | 0.85         |
|                   | S2 bands + EVI2 + NDRe2 + GNDWI          | 104                   | 0.92               | 0.80     | 0.80     | 0.85     | 0.90     | 0.81     | 0.86        | 0.83        | 0.86        | 0.85         |
| RI                | RVI                                      | 8                     | 0.63               | 0.61     | 0.49     | 0.58     | 0.58     | 0.42     | 0.62        | 0.54        | 0.50        | 0.55         |
|                   | Diff                                     | 8                     | 0.57               | 0.61     | 0.54     | 0.60     | 0.67     | 0.55     | 0.59        | 0.57        | 0.61        | 0.59         |
|                   | Ratio                                    | 8                     | 0.62               | 0.64     | 0.46     | 0.56     | 0.59     | 0.45     | 0.63        | 0.51        | 0.52        | 0.55         |
| RI combined       | RVI + Diff + Ratio                       | 24                    | 0.64               | 0.65     | 0.58     | 0.65     | 0.63     | 0.56     | 0.64        | 0.62        | 0.59        | 0.62         |
| S1                | VV + VH                                  | 16                    | 0.77               | 0.66     | 0.63     | 0.72     | 0.77     | 0.66     | 0.72        | 0.67        | 0.72        | 0.70         |
| S1 + RI           | VV + VH + RVI                            | 24                    | 0.77               | 0.69     | 0.61     | 0.73     | 0.76     | 0.68     | 0.73        | 0.67        | 0.72        | 0.71         |
|                   | VV + VH + Diff                           | 24                    | 0.75               | 0.71     | 0.65     | 0.77     | 0.81     | 0.67     | 0.73        | 0.71        | 0.74        | 0.73         |
|                   | VV + VH + Ratio                          | 24                    | 0.75               | 0.72     | 0.62     | 0.73     | 0.77     | 0.66     | 0.74        | 0.67        | 0.72        | 0.71         |
|                   | VV + VH + RVI + Diff + Ratio             | 40                    | 0.74               | 0.70     | 0.64     | 0.69     | 0.80     | 0.65     | 0.72        | 0.66        | 0.72        | 0.70         |
| VI + S1 + RI      | EVI2 + NDRe2 + VV + VH + Diff            | 40                    | 0.89               | 0.82     | 0.70     | 0.84     | 0.80     | 0.79     | 0.86        | 0.77        | 0.80        | 0.81         |
|                   | EVI2 + NDRe2 + GNDWI + VV + VH + Diff    | 48                    | 0.91               | 0.80     | 0.73     | 0.85     | 0.82     | 0.77     | 0.85        | 0.79        | 0.80        | 0.81         |
| S2 + S1           | S2 bands + VV + VH                       | 96                    | 0.91               | 0.81     | 0.80     | 0.87     | 0.88     | 0.81     | 0.86        | 0.83        | 0.84        | 0.85         |
| S2 + S1 + RI      | S2 bands + VV + VH + Diff                | 104                   | 0.90               | 0.84     | 0.81     | 0.86     | 0.88     | 0.83     | 0.87        | 0.83        | 0.85        | 0.85         |
| S2 + VI + S1 + RI | S2 bands + EVI2 + NDRe2 + VV + VH + Diff | 120                   | 0.92               | 0.84     | 0.82     | 0.88     | 0.89     | 0.85     | 0.88        | 0.85        | 0.87        | 0.86         |

## Amhara 2021

| Reference data     | Classified data |      |      |      |       |       |      |       |       |      |       | Total | PA [%] |
|--------------------|-----------------|------|------|------|-------|-------|------|-------|-------|------|-------|-------|--------|
| Crop type          | 1               | 3    | 4    | 5    | 6     | 8     | 10   | 12    | 15    | 18   | 19    |       |        |
| Maize (1)          | 24              | -    | -    | -    | -     | -     | 1    | -     | -     | -    | -     | 25    | 96.0   |
| Sunflower (3)      | -               | 19   | -    | -    | -     | -     | -    | -     | -     | -    | -     | 19    | 100.0  |
| Sesame (4)         | -               | -    | 5    | -    | -     | -     | -    | -     | -     | -    | -     | 5     | 100.0  |
| Mung bean (5)      | -               | -    | -    | 5    | -     | -     | -    | -     | -     | -    | -     | 5     | 100.0  |
| Soya bean (6)      | 1               | 1    | -    | -    | 17    | -     | -    | -     | -     | -    | -     | 19    | 89.5   |
| Haricot bean (8)   | -               | -    | -    | -    | -     | 5     | -    | -     | -     | -    | -     | 5     | 100.0  |
| Pepper (10)        | 1               | -    | -    | -    | -     | -     | 4    | -     | -     | 1    | -     | 6     | 66.7   |
| Chickpea (12)      | 2               | -    | -    | -    | -     | -     | -    | 4     | -     | -    | -     | 6     | 66.7   |
| Wheat (15)         | -               | -    | 1    | 1    | -     | -     | -    | -     | 8     | -    | -     | 10    | 80.0   |
| Teff (18)          | -               | -    | -    | -    | -     | -     | -    | -     | -     | 4    | -     | 4     | 100.0  |
| Finger Millet (19) | -               | -    | -    | -    | -     | -     | -    | -     | -     | -    | 6     | 6     | 100.0  |
| Total              | 28              | 20   | 6    | 6    | 17    | 5     | 5    | 4     | 8     | 5    | 6     | 110   | OA [%] |
| UA [%]             | 85.7            | 95.0 | 83.3 | 83.3 | 100.0 | 100.0 | 80.0 | 100.0 | 100.0 | 80.0 | 100.0 |       | 91.8   |

## Benishangul 2021

| Reference data  | Classified data |      |     |      |       |      |       |      | Total | PA [%] |
|-----------------|-----------------|------|-----|------|-------|------|-------|------|-------|--------|
| Crop type       | 1               | 2    | 4   | 6    | 7     | 10   | 18    | 20   |       |        |
| Maize (1)       | 32              | 2    | -   | -    | -     | -    | -     | -    | 34    | 94.1   |
| Sorghum (2)     | 1               | 35   | -   | 3    | -     | -    | -     | -    | 39    | 89.7   |
| Sesame (4)      | 1               | 1    | 0   | -    | -     | -    | -     | -    | 2     | 0.0    |
| Soya bean (6)   | 5               | 3    | -   | 33   | -     | 3    | -     | 1    | 45    | 73.3   |
| Groundnut (7)   | 1               | -    | -   | -    | 2     | -    | -     | -    | 3     | 66.7   |
| Pepper (10)     | 1               | 2    | -   | 2    | -     | 20   | -     | 1    | 26    | 76.9   |
| Teff (18)       | -               | -    | -   | -    | -     | -    | 3     | -    | 3     | 100.0  |
| Niger seed (20) | -               | -    | 1   | -    | -     | -    | -     | 2    | 3     | 66.7   |
| Total           | 41              | 43   | 1   | 38   | 2     | 23   | 3     | 4    | 155   | OA [%] |
| UA [%]          | 78.0            | 81.4 | 0.0 | 86.8 | 100.0 | 87.0 | 100.0 | 50.0 |       | 81.9   |

## Gambella 2021

| Reference data | Classified data |      |      |      | Total | PA [%] |
|----------------|-----------------|------|------|------|-------|--------|
| Crop type      | 1               | 2    | 5    | 9    |       |        |
| Maize (1)      | 8               | 1    | 1    | -    | 10    | 80.0   |
| Sorghum (2)    | -               | 3    | 1    | 2    | 6     | 50.0   |
| Mung bean (5)  | -               | -    | 31   | -    | 31    | 100.0  |
| Cotton (9)     | 2               | -    | 2    | 31   | 35    | 88.6   |
| Total          | 10              | 4    | 35   | 33   | 82    | OA [%] |
| UA [%]         | 80.0            | 75.0 | 88.6 | 93.9 |       | 89.0   |

## Amhara 2022

| Reference data     | Classified data |       |       |      |      |       |    |      |       |       |   | Total | PA [%] |
|--------------------|-----------------|-------|-------|------|------|-------|----|------|-------|-------|---|-------|--------|
| Crop type          | 1               | 3     | 4     | 5    | 6    | 8     | 10 | 15   | 18    | 19    |   |       |        |
| Maize (1)          | 27              | -     | -     | -    | 1    | -     | -  | 1    | -     | -     | - | 29    | 93.1   |
| Sunflower (3)      | 1               | 17    | -     | -    | -    | -     | -  | -    | -     | -     | - | 18    | 94.4   |
| Sesame (4)         | 1               | -     | 3     | -    | 1    | -     | -  | -    | -     | -     | - | 5     | 60.0   |
| Mung bean (5)      | -               | -     | -     | 5    | 1    | -     | -  | -    | -     | -     | - | 6     | 83.3   |
| Soya bean (6)      | 3               | -     | -     | 1    | 22   | -     | -  | -    | -     | -     | - | 26    | 84.6   |
| Haricot bean (8)   | 1               | -     | -     | -    | -    | 3     | -  | -    | -     | -     | - | 4     | 75.0   |
| Pepper (10)        | 2               | -     | -     | 1    | 2    | -     | 0  | -    | -     | -     | - | 5     | 0.0    |
| Wheat (15)         | 1               | -     | -     | -    | -    | -     | -  | 20   | -     | -     | - | 21    | 95.2   |
| Teff (18)          | 1               | -     | -     | -    | 1    | -     | -  | -    | 3     | -     | - | 5     | 60.0   |
| Finger Millet (19) | -               | -     | -     | 1    | -    | -     | -  | -    | -     | 2     | - | 3     | 66.7   |
| Total              | 37              | 17    | 3     | 8    | 28   | 3     | 0  | 21   | 3     | 2     |   | 122   | OA [%] |
| UA [%]             | 73.0            | 100.0 | 100.0 | 62.5 | 78.6 | 100.0 | -  | 95.2 | 100.0 | 100.0 |   |       | 83.6   |

## Benishangul 2022

| Reference data  | Classified data |      |       |      |       |      | Total | PA [%] |
|-----------------|-----------------|------|-------|------|-------|------|-------|--------|
| Crop type       | 1               | 2    | 6     | 10   | 18    | 20   |       |        |
| Maize (1)       | 23              | 1    | -     | 2    | -     | -    | 26    | 88.5   |
| Sorghum (2)     | 2               | 24   | -     | -    | -     | 1    | 27    | 88.9   |
| Soya bean (6)   | -               | 1    | 10    | -    | -     | -    | 11    | 90.9   |
| Pepper (10)     | 2               | 3    | -     | 33   | -     | -    | 38    | 86.8   |
| Teff (18)       | -               | -    | -     | 2    | 3     | -    | 5     | 60.0   |
| Niger seed (20) | -               | -    | -     | -    | -     | 6    | 6     | 100.0  |
| Total           | 27              | 29   | 10    | 37   | 3     | 7    | 113   | OA [%] |
| UA [%]          | 85.2            | 82.8 | 100.0 | 89.2 | 100.0 | 85.7 |       | 87.6   |

## Gambella 2022

| Reference data | Classified data |       |       |      |       |      |       |        |
|----------------|-----------------|-------|-------|------|-------|------|-------|--------|
| Crop type      | 1               | 2     | 4     | 5    | 6     | 9    | Total | PA [%] |
| Maize (1)      | 19              | -     | -     | 2    | -     | -    | 21    | 90.5   |
| Sorghum (2)    | 2               | 3     | -     | 4    | -     | -    | 9     | 33.3   |
| Sesame (4)     | -               | -     | 7     | -    | -     | -    | 7     | 100.0  |
| Mung bean (5)  | 5               | -     | -     | 22   | -     | -    | 27    | 81.5   |
| Soya bean (6)  | -               | -     | -     | 2    | 12    | 2    | 16    | 75.0   |
| Cotton (9)     | -               | -     | -     | -    | -     | 31   | 31    | 100.0  |
| Total          | 26              | 3     | 7     | 30   | 12    | 33   | 111   | OA [%] |
| UA [%]         | 73.1            | 100.0 | 100.0 | 73.3 | 100.0 | 93.9 |       | 84.7   |

**Figure S2.** Confusion matrix tables for the crop type classifications for the three study areas Amhara, Benishangul and Gambella for the years 2021 and 2022. The accuracies are given as user's accuracies (UA), producer's accuracies (PA) and overall accuracy (OA).
